# Supplementary material for: Three-dimensional nanoarchitectures of Co nanoparticles inlayed on N-doped macroporous carbon as bifunctional electrocatalysts for glucose fuel cells
Source: Royal Society of Chemistry journal article supplement (doi:10.1039/c7ta04114d), 2017-01-01
Supplement: c7ta04114d1.pdf [file c7ta04114d1.pdf]

## Support information for:

### **Three Dimensional Nanoarchitectures of Co Nanoparticles Inlayed on N-doped Macroporous Carbon as Bifunctional Electrocatalysts for Glucose Fuel Cells**

Liangzhen Liu<sup>1, 2</sup>, Suqin Ci<sup>1\*</sup>, Linlin Bi<sup>1, 2</sup>, JingchunJia, Zhenhai Wen<sup>1, 2, 3\*</sup>

*1 Key Laboratory of Jiangxi Province for Persistent Pollutants Control and Resources Recycle, Nanchang Hangkong University, Nanchang 330063, China*

*2 CAS Key Laboratory of Design and Assembly of Functional Nanostructures, Fujian Institute of Research on the Structure of Matter, Chinese Academy of Sciences, Fuzhou, Fujian 350002, P. R. China*

*3 Fujian Provincial Key Laboratory of Nanomaterials, Fujian Institute of Research on the Structure of Matter, Chinese Academy of Sciences, Fuzhou, Fujian 350002, P. R. China*

\*E-mail: [sqci@nchu.edu.cn](mailto:sqci@nchu.edu.cn), [wen@fjirsm.ac.cn](mailto:wen@fjirsm.ac.cn)

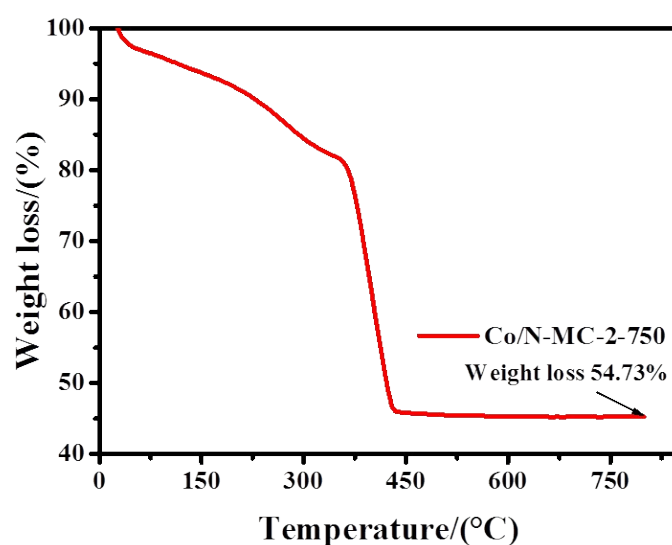

**Figure S1.** Thermogravimetric analysis curve of Co/N-MC-2-750 measured from 30 to 800 °C in air atmosphere with a heating rate of 10 °C/min. It was pointed out that, Co/N-MC-2-750 at between 0 and 100°C, the water was evaporated; between the 200 and 320 °C, the Co phase was oxidized by air to transform into  $\text{Co}_3\text{O}_4$  phase; Based on the mass of  $\text{Co}_3\text{O}_4$  (45.27 wt%) left after 800 °C, it can be calculated that the Co content in hybrid is 61.86 wt%.

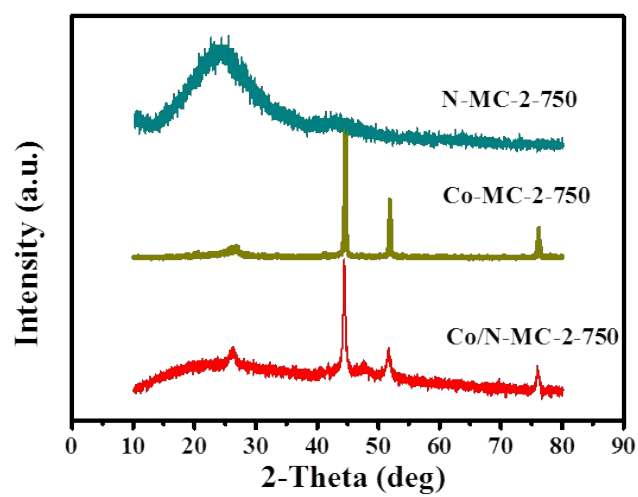

**Figure S2.** XPS spectra of Co/N-MC-2-750, Co-MC-2-750 and N-MC-2-750.

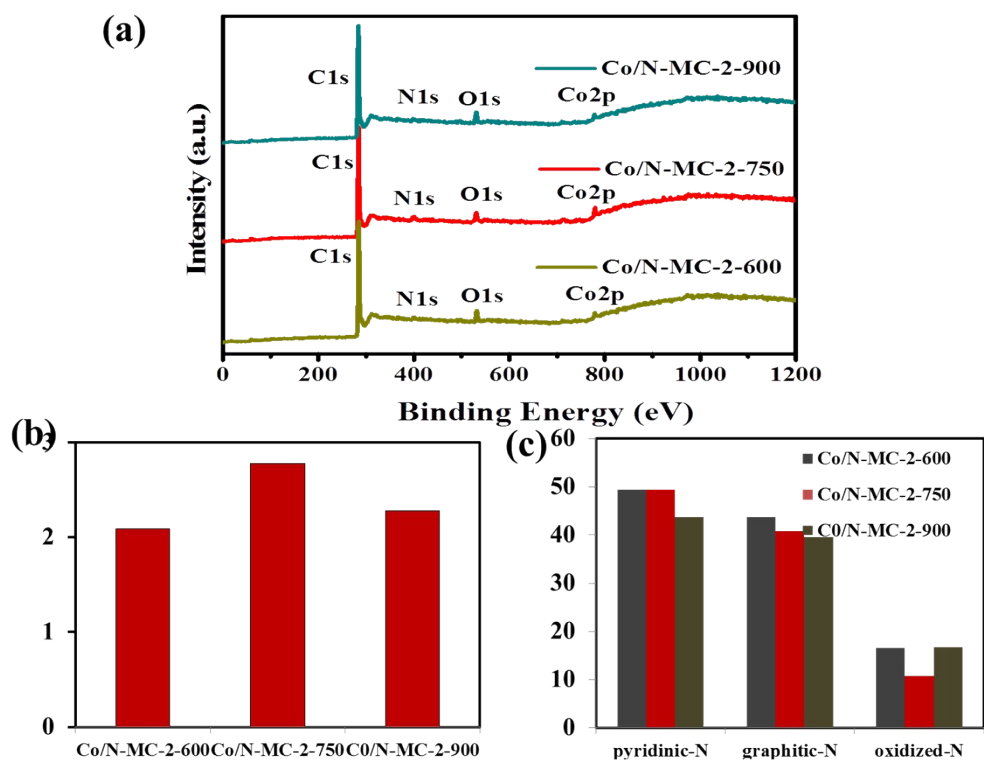

Figure S3. (a) XPS surveys of the Co/N-MCs samples; (b) the total N content (percentage content: 100 %) of the all Co/N-MCs samples; (c) different types of N in Co/N-MC-2-600, Co/N-MC-2-750 and Co/N-MC-2-900.

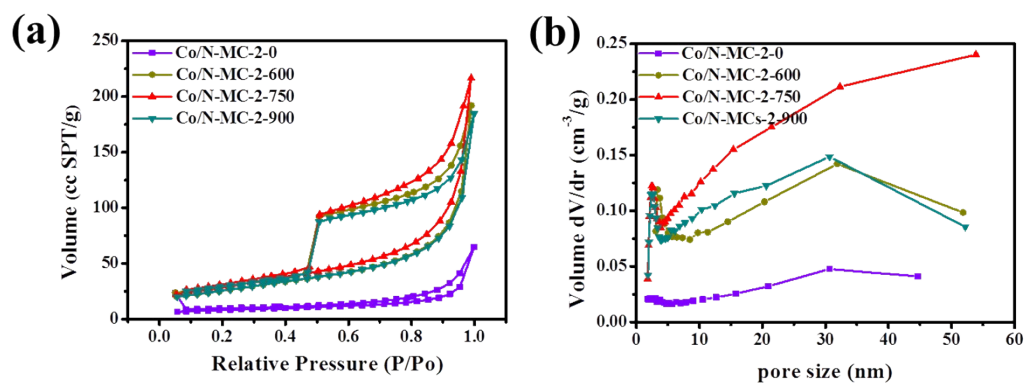

**Figure S4.** (a) N<sub>2</sub> adsorption/desorption isotherm curves of all catalysts and (b) pore size distributions of all Co/N-MCs catalysts.

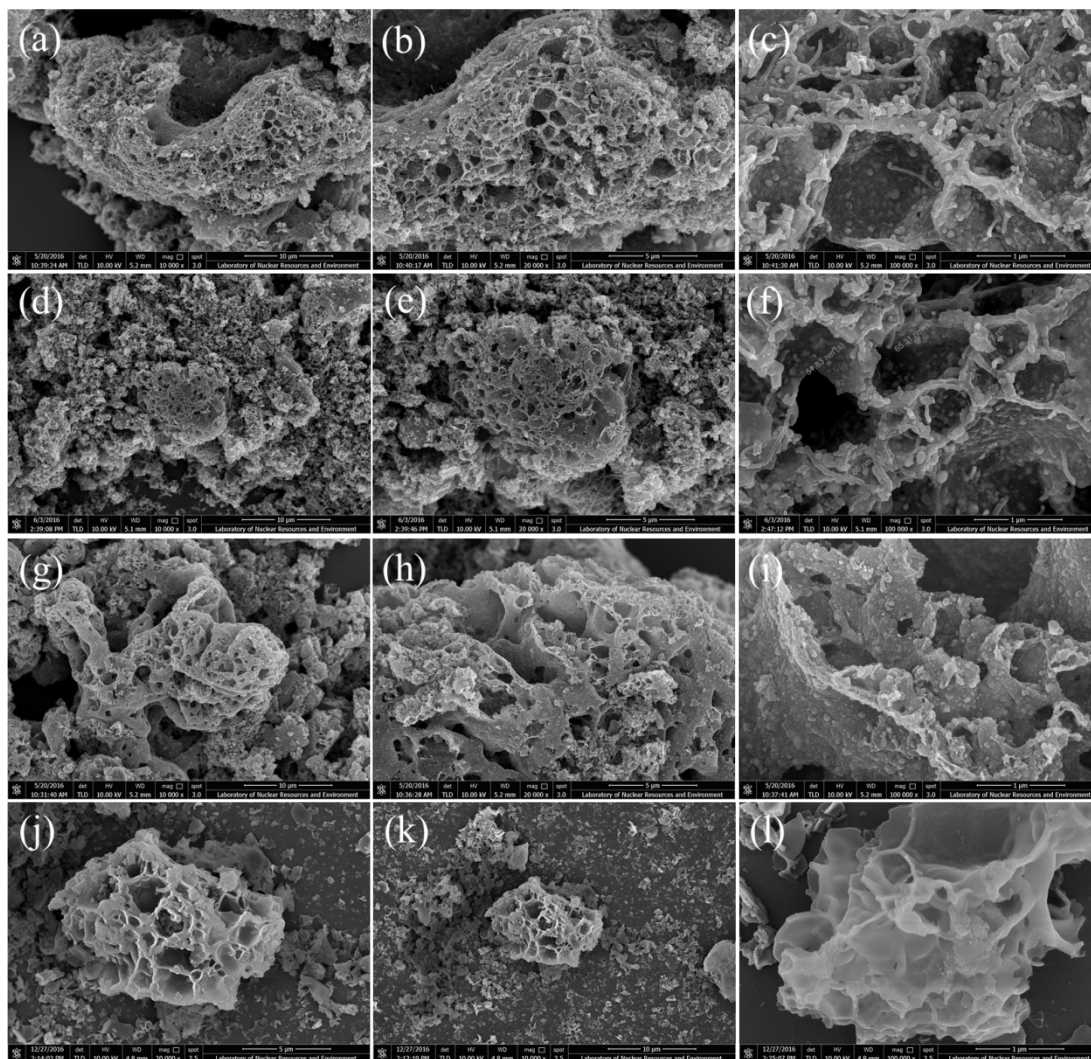

Figure S5. The SEM images of Co/N-MC-2-750 (a, b, c); Co/N-MC-2-900 (d, e, f), Co/N-MC-2-600 (g, h, i) and Co/N-MC-2-0 (j, k, l), respectively.

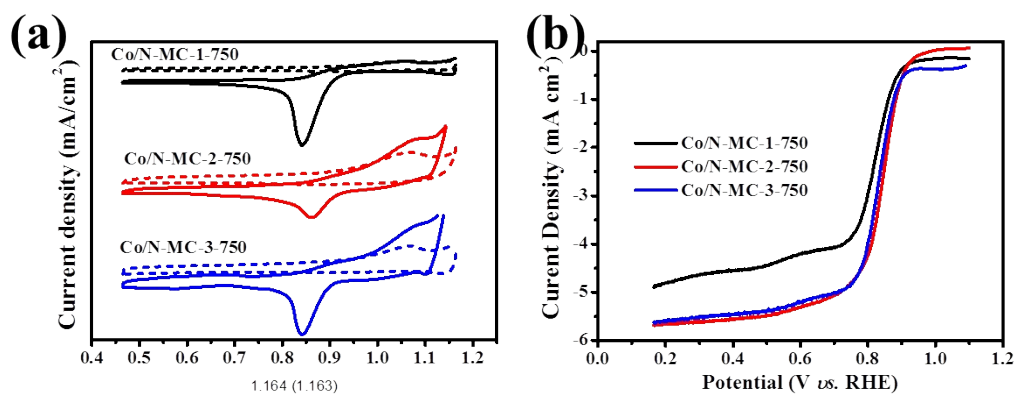

Figure S6. (a) Cycle voltammetry of Co/N-MC-1-750, Co/N-MC-2-750, Co/N-MC-2-750 and Co/N-MC-3-750 in  $\text{O}_2$  (the solid line) and  $\text{N}_2$  (the dotted line) saturated 0.1M KOH solution with a scanning rate of  $10 \text{ mV s}^{-1}$ ; (b) linear sweep voltammetry of Co/N-MC-1-750, Co/N-MC-2-750 and Co/N-MC-3-750 at a rotation rate of 1600 rpm.

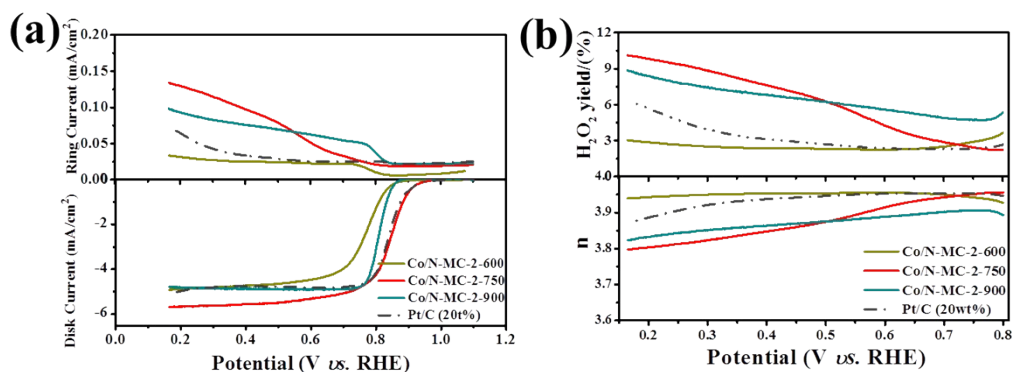

Figure S7. (a) RRDE curves of various electrocatalysts in 0.1M KOH solution at a rotation speed of 1600rpm: current density at disk and ring electrodes for Co/N-MC-2-600, Co/N-MC-2-750, Co/N-MC-2-900 and Pt/C (20wt%); (b)  $H_2O_2$  yield and electron transfer number (n) for Co/N-MC-2-600, Co/N-MC-2-750, Co/N-MC-2-900 and Pt/C (20wt%).



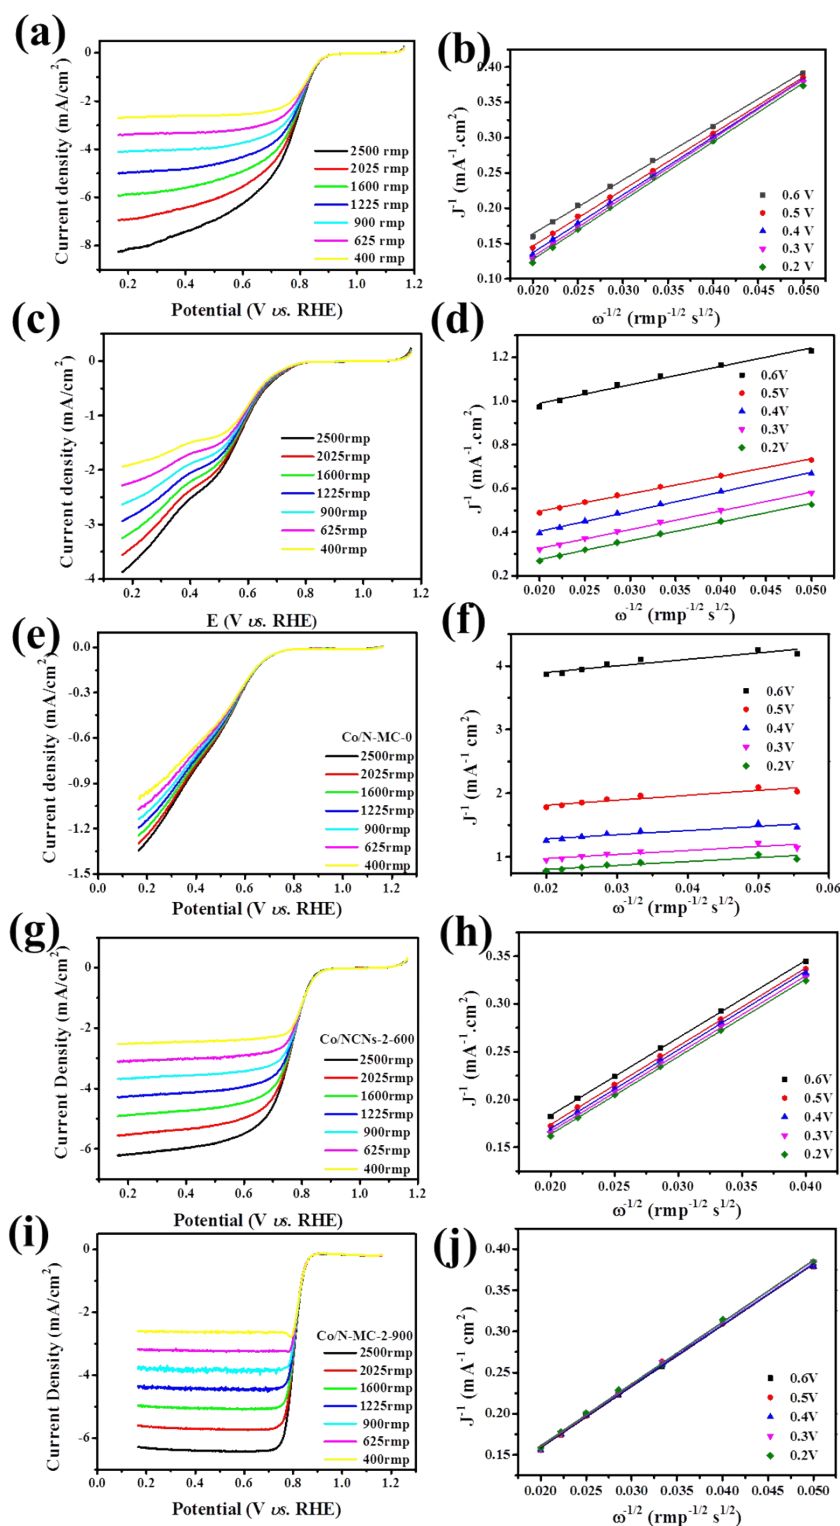

**Figure S8.** Rotation disk electrode (RDE) polarization curves of the N-MC-2-750 (a), the Co-MC-2-750 (c), the Co/N-MC-2-0 (e), the Co/N-MC-2-600 (g) and the Co/N-MC-2-900 (i) at various rotating speeds, respectively; the corresponding K-L plots of the N-MC-2-750 (b), the Co-MC-2-750 (d), the Co/N-MC-2-0 (f), the Co/N-MC-2-600 (h) and the Co/N-MC-2-900 (j) at different potentials, respectively.

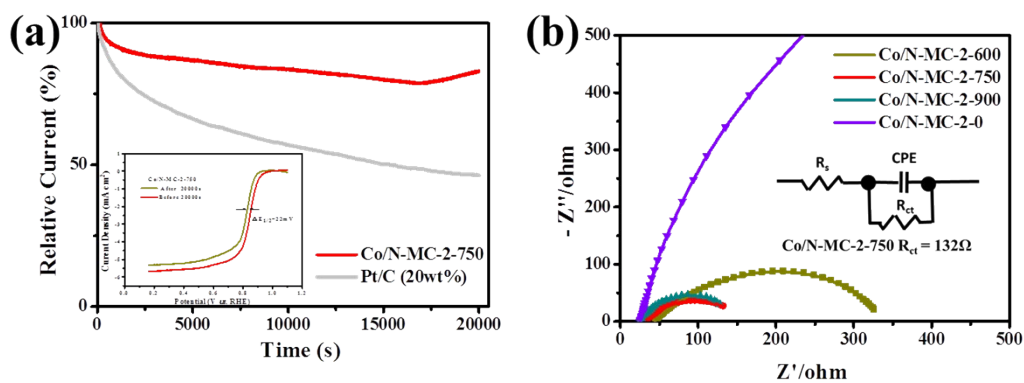

**Figure S9** (a) Chronoamperometry of Co/N-MC-2-750 and Pt/C electrodes in O<sub>2</sub>-saturated 0.1M KOH at -0.3V(vs. *Ag/AgCl*) for 20,000 s (Inset shows RDE polarization curves of Co/N-MC-2-750 of before i-t test and after i-t test); (b) Impedance diagram of all Co/N-MCs catalysts in oxygen saturated 0.1 M KOH electrolyte at a rotation rate of 1600 rpm.

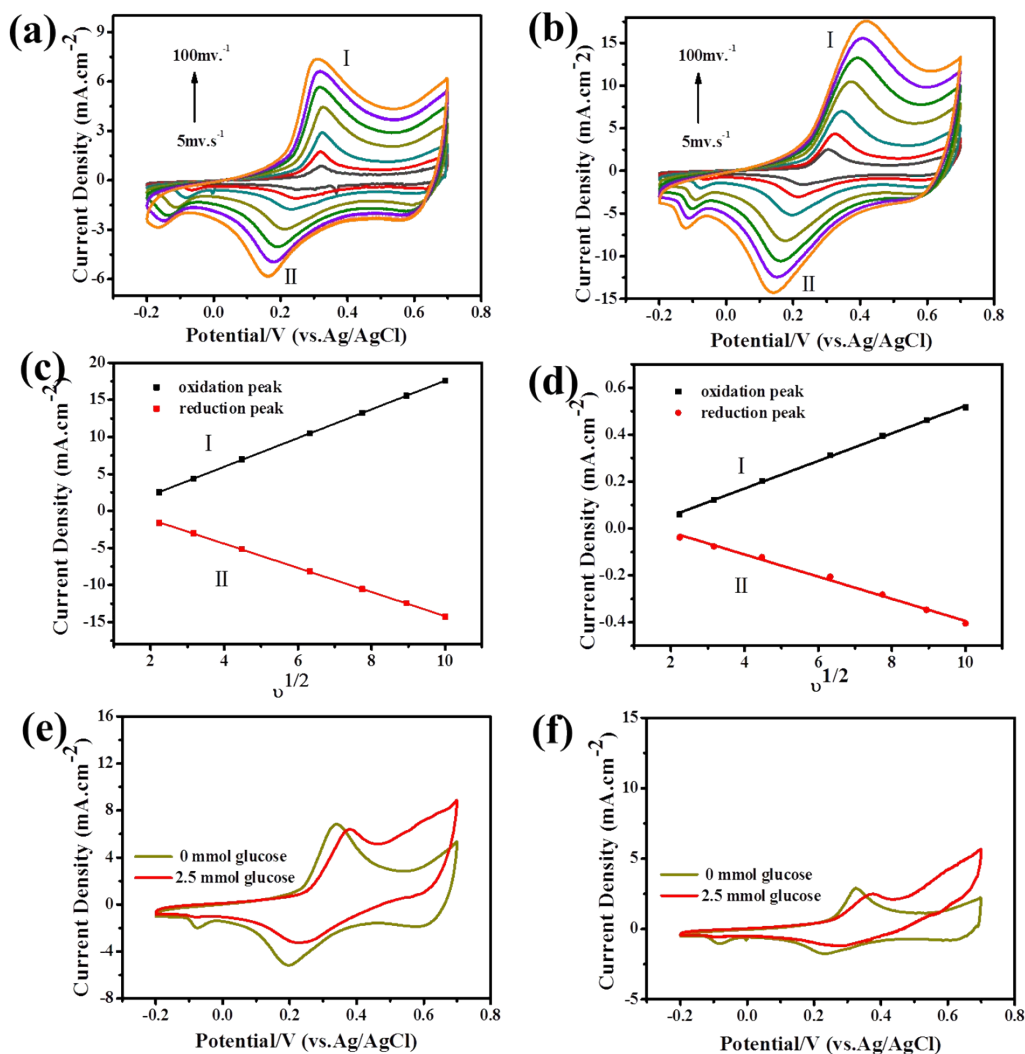

**Figure S10.** (a, b) CVs of the Co/N-MC-2-600 and Co/N-MC-2-900 in Ar-saturated 0.1 M KOH solution at various scan rates of 5, 10, 20, 40, 60, 80, 100 mV/s; (c, d) the plot of peak currents of the Co/N-MC-2-600 and Co/N-MC-2-900 vs. square root of scan rate; (e, f) CVs of the Co/N-MC-2-600 and Co/N-MC-2-900 in absence and presence of 2.5 mM glucose at a scan rate of 100 mV s $^{-1}$  in Ar-saturated 0.1 M KOH solution.

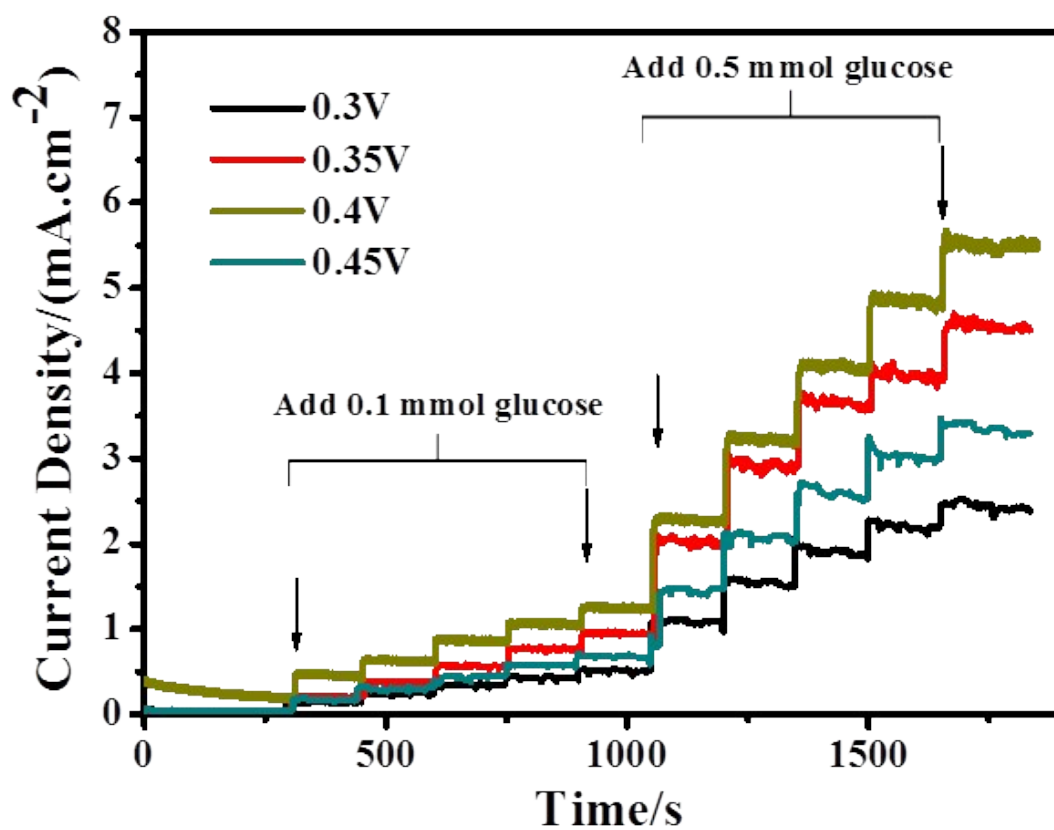

**Figure S11.** (a) Amperometric response to successive additions of glucose at the Co/N-MC-2-750 electrode in Ar-saturated 0.1M KOH solution with magnetic stirring at different applied potential.

**Table S1.** The detailed electrochemical performance parameters of all catalysts and the Pt/C (20 wt%) catalyst for ORR, and the other corresponding experimental data.

| Sample      | E <sub>onset</sub><br>(V) | E <sub>1/2</sub><br>(V) | E <sub>cp</sub><br>(V) | J <sub>k</sub> (mA cm <sup>-2</sup> )<br>at 0.5V | n         | the Tafel<br>plots | BET surface<br>area (m <sup>2</sup> .g <sup>-1</sup> ) | Pore Volume<br>(cm <sup>3</sup> .g <sup>-1</sup> ) |
|-------------|---------------------------|-------------------------|------------------------|--------------------------------------------------|-----------|--------------------|--------------------------------------------------------|----------------------------------------------------|
| Co/NCNs-0   | 0.823                     | 0.465                   | 0.609                  | -                                                | -         | -                  | 28.1                                                   | 0.097                                              |
| Co/NCNs-600 | 0.904                     | 0.77                    | 0.78                   | 4.87                                             | 3.93-3.95 | 72.75              | 92.36                                                  | 0.30                                               |
| Co/NCNs-750 | 1.000                     | 0.84                    | 0.863                  | 6.25                                             | 3.80-3.96 | 61.45              | 103.4                                                  | 0.34                                               |
| Co/NCNs-900 | 0.906                     | 0.809                   | 0.839                  | 5.38                                             | 3.82-3.91 | 47.36              | 92.5                                                   | 0.29                                               |
| Pt/C (20%)  | 0.992                     | 0.839                   | 0.871                  | -                                                | 3.88-3.95 | 75.66              | -                                                      | -                                                  |

**Table S2. Comparisons of the ORR performance between this work with representative published data on M, N - double doped carbon materials.**

| M-N-C material                            | Onset potential (V vs RHE) | Half-wave potential (V vs RHE) | Average electron transfer number (n) | BET surface area (m <sup>2</sup> .g <sup>-1</sup> ) | Reference |
|-------------------------------------------|----------------------------|--------------------------------|--------------------------------------|-----------------------------------------------------|-----------|
| Co/NG                                     | 0.963                      | 0.814                          | 3.8                                  | 65.1                                                | 5         |
| Co <sub>2</sub> N-CNF                     | 0.889                      | 0.809                          | 0.78                                 | 1170                                                | 12        |
| Co-C@Co <sub>9</sub> S <sub>8</sub> DSNCs | 0.96                       | 0.83                           | ~3.8                                 | 106.2                                               | 2         |
| Fe-NMCSs                                  | 1.027                      | 0.86                           | 3.94~3.99                            | 674                                                 | 50        |
| NCNTFs                                    | 0.95                       | 0.87                           | 3.97~3.99                            | 513                                                 | 10        |
| Fe-NG                                     | 0.885                      | 0.752                          | -                                    | 1200                                                | 38        |
| Co-N-GCI                                  | ~0.97                      | 0.857                          | ~3.9                                 | 365.2                                               | 21        |
| GMP-CoPors                                | ~0.95                      | 0.818                          | 3.8                                  | 685                                                 | 20        |
| PANKCo2                                   | ~0.92                      | 0.839                          | 3.6~.61                              | -                                                   | 18        |
| FeCo-NMCG                                 | 0.904                      | 0.774                          | 3.95                                 | 371                                                 | 24        |
| Fe-N/C-700                                | 0.956                      | 0.84                           | 4.02                                 | 363                                                 | 55        |
| Co-N-OMMC-0.6                             | ~0.97                      | 0.83                           | 3.9                                  | 635                                                 | 56        |
| Co/N/GR                                   | 0.897                      | ~0.8                           | 3.9                                  | 186                                                 | 43        |
| Co/CoNx/CNT                               | 0.9                        | 0.77                           | 3.77                                 | 138.9                                               | 44        |
| NCN-Co-0.1                                | 0.961                      | 0.824                          | 3.85~3.99                            | -                                                   | 45        |
| Co/N-MC-2-750                             | 1.0                        | 0.84                           |                                      | 103.5                                               | This work |

**Table S3.** Impedance components determined by fitting the experimental data using the equivalent circuit (Figure S9b). (Rs represent electrolyte resistance; Rct the charge transfer resistance; CPE represent interfacial resistance.)

| Sample        | Rs    | Rct   | CPE-T     | CPE-P   |
|---------------|-------|-------|-----------|---------|
| Co/N-MC-0     | 25.41 | 2903  | 0.0000082 | 0.89796 |
| Co/N-MC-600   | 43.9  | 308.6 | 0.0001251 | 0.64386 |
| Co/N-MC-750   | 31.82 | 132.5 | 0.0010454 | 0.64761 |
| Co/N-MC-900   | 26.23 | 124.2 | 0.0009128 | 0.80128 |
| Anode (GFC)   | 0.20  | 1.87  | 0.000159  | 0.82327 |
| Cathode (GFC) | 13.26 | 16.42 | 0.0000926 | 0.8102  |
